# Supplementary material
Source: PubMed Central journal article supplement (PMC5540325)

# Supplementary Figure S1

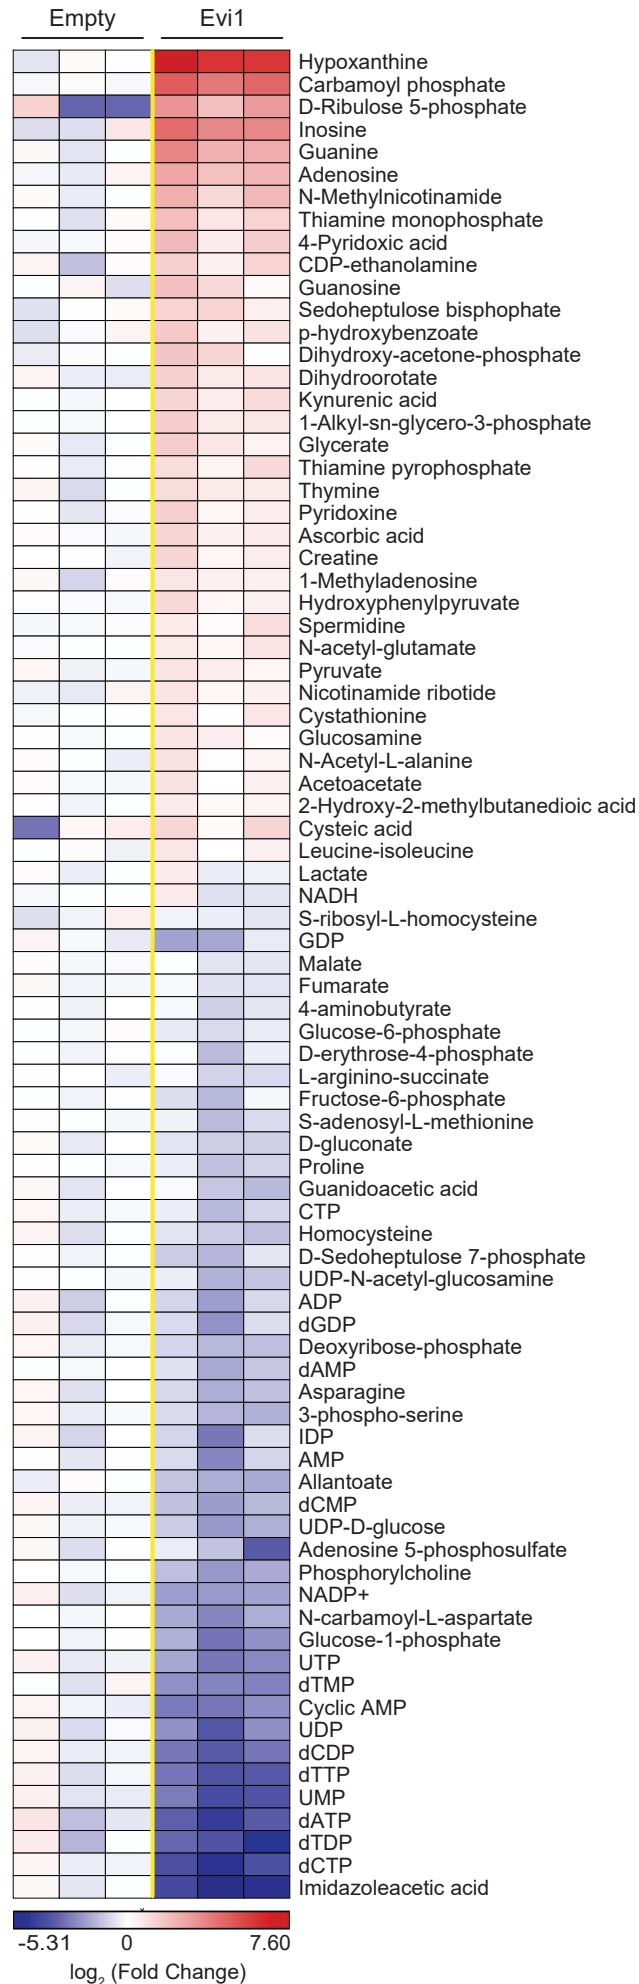

# Supplementary Figure S2

**A.**

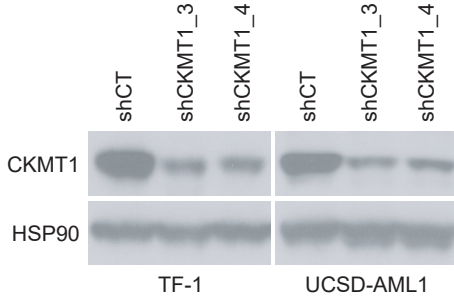

**B.**

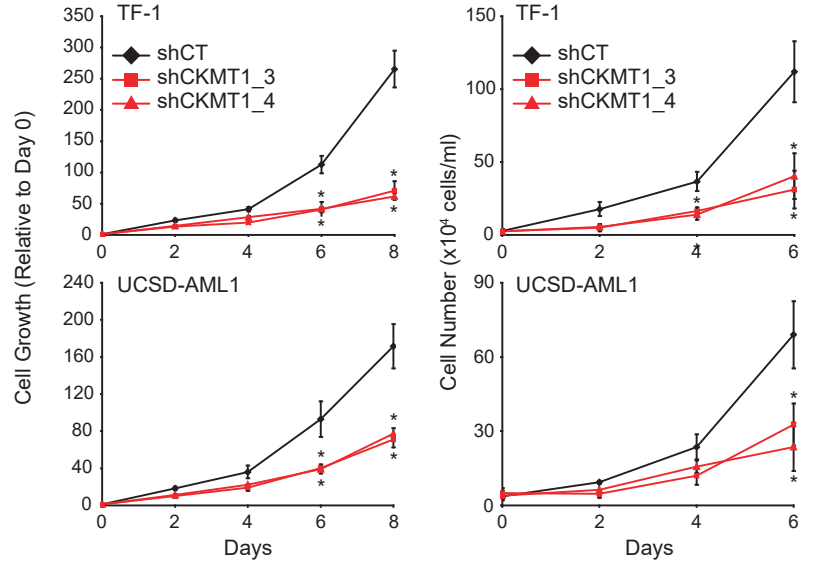

**C.**

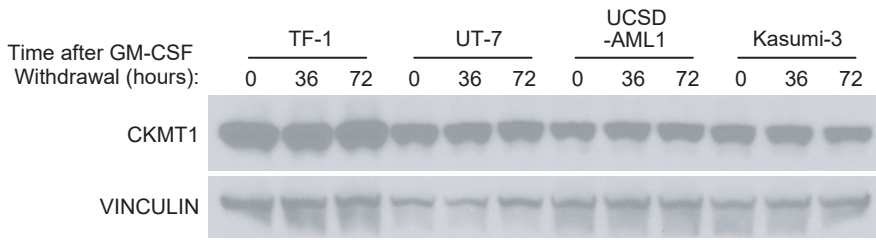

**D.**

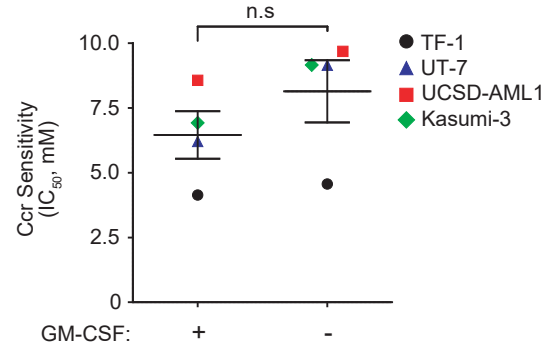

**E.**

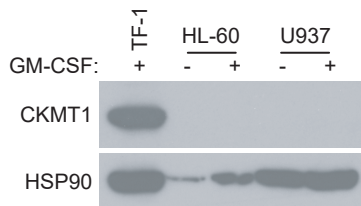

# Supplementary Figure S3

**A.**

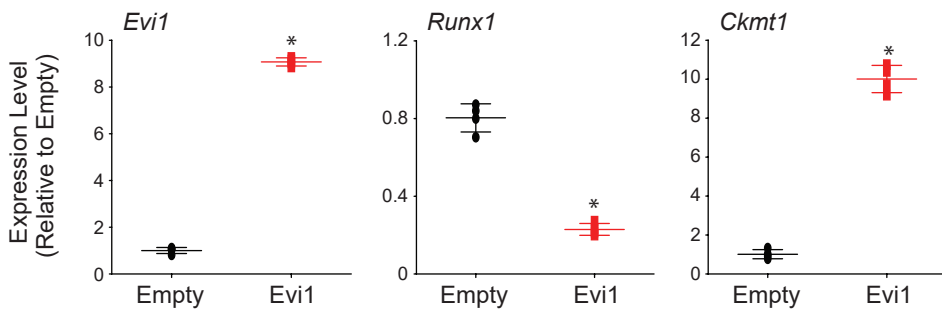

**B.**

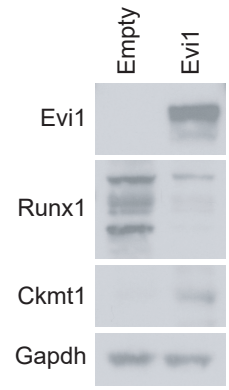

**C.**

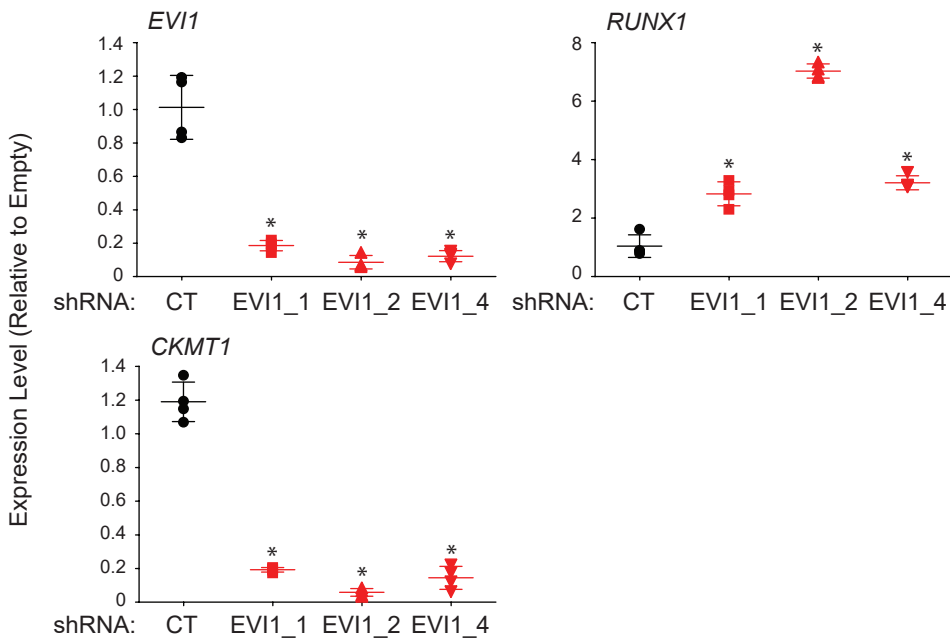

**D.**

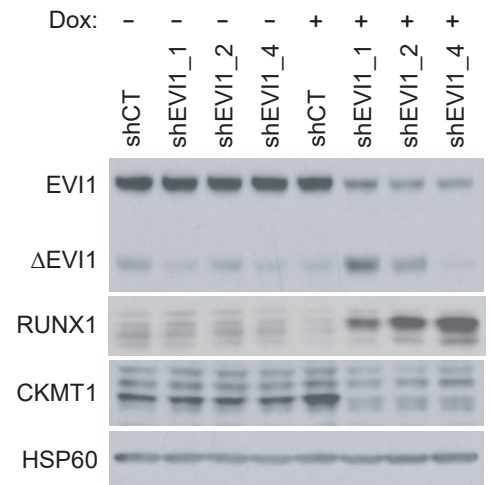

# Supplementary Figure S4

**A.**

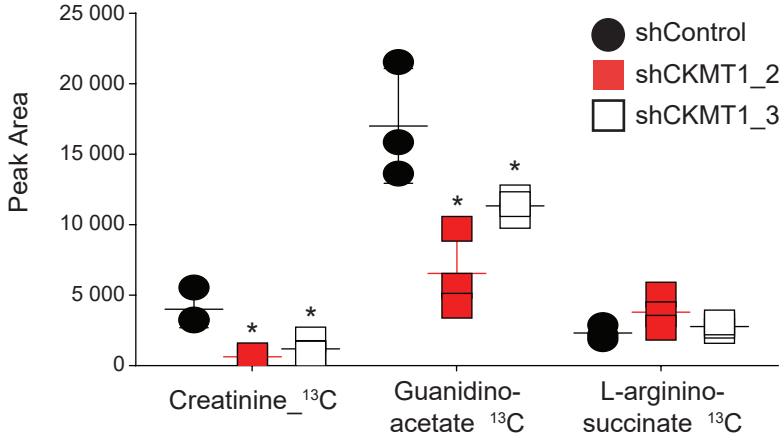

**B.**

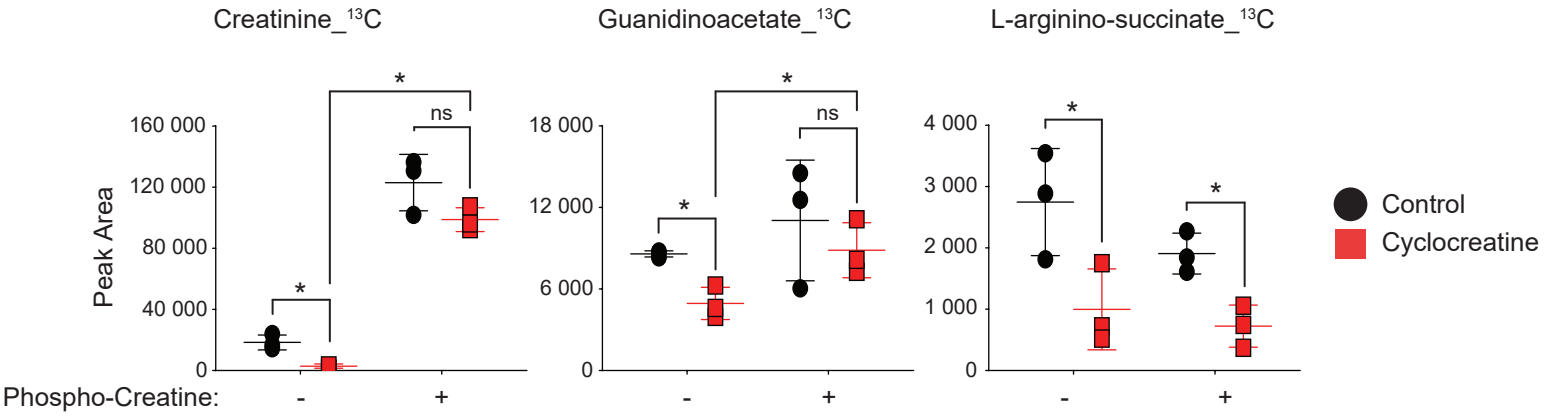

# Supplementary Figure S5

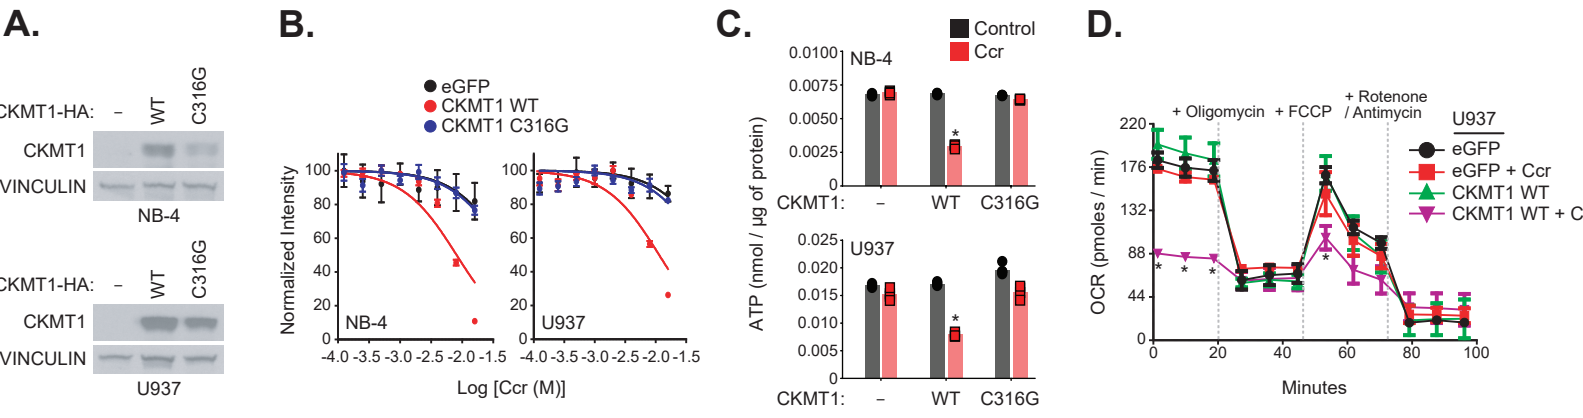

# Supplementary Figure S6

**A.**

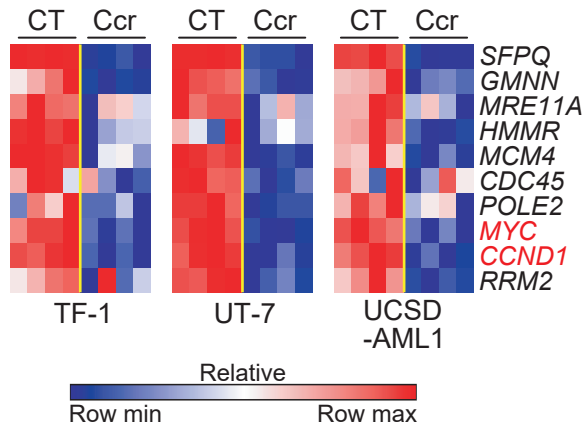

**B.**

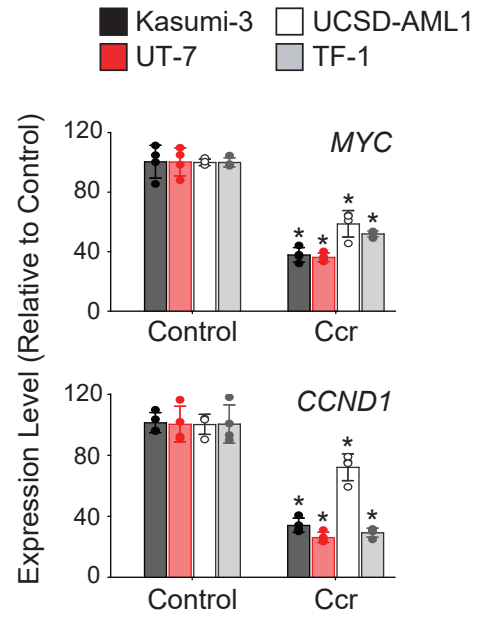

# Supplementary Figure S7

**A.**

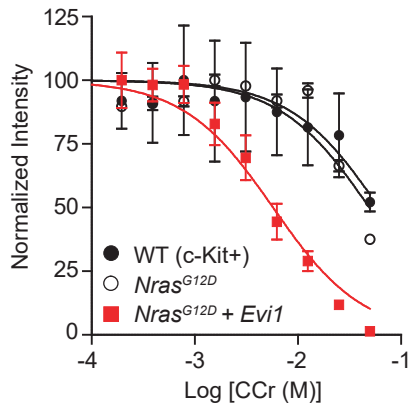

**B.**

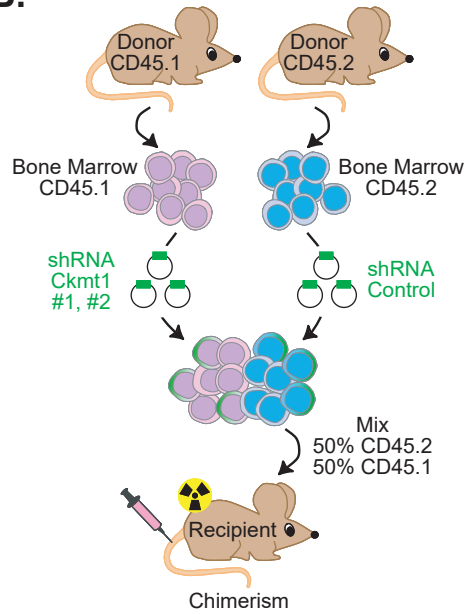

**C.**

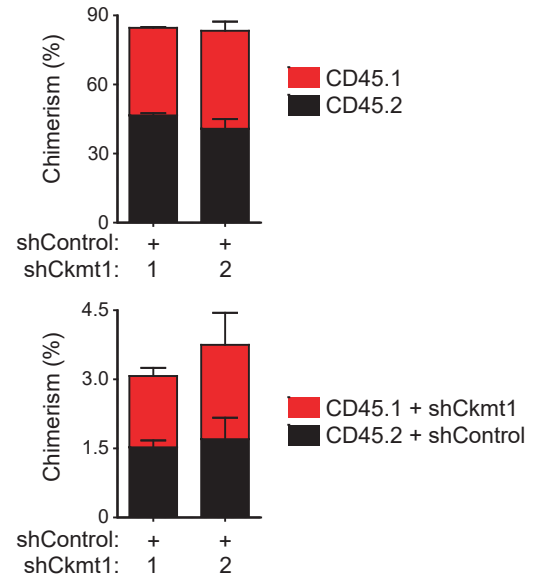

**D.**

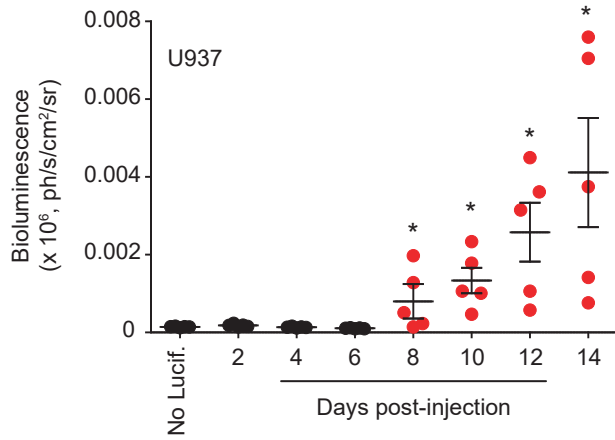

**E.**

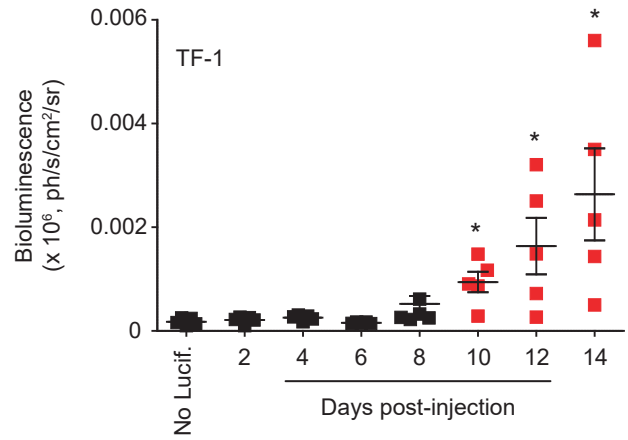

## Supplementary Table S1

| Gene   | Category             | NES<br>UCSD-AML1 | Log10 (P Value)<br>UCSD-AML1 | NES<br>TF-1 | Log10 (P Value)<br>TF-1 |
|--------|----------------------|------------------|------------------------------|-------------|-------------------------|
| DLD    | Core_Depletion       | -2.94            | 1.80                         | -4.11       | 2.64                    |
| RPIA   | Core_Depletion       | -1.44            | 1.24                         | -2.91       | 2.40                    |
| OGDH   | Core_Depletion       | -3.57            | 2.51                         | -2.33       | 1.81                    |
| SDHA   | Core_Depletion       | -2.13            | 1.38                         | -1.99       | 1.29                    |
| CS     | Core_Depletion       | -1.32            | 1.05                         | -1.50       | 1.15                    |
| ALDOC  | Core_Depletion       | -1.97            | 1.42                         | -1.41       | 1.46                    |
| CKMT1  | Core_Depletion       | -1.75            | 1.31                         | -1.32       | 1.04                    |
| GAPDH  | Core_Depletion       | -3.20            | 2.20                         | -1.16       | 1.07                    |
| ACO2   | Core_Depletion       | -2.72            | 2.00                         | -0.47       | 0.90                    |
| DLST   | TF-1_Depletion       | 0.91             | 0.25                         | -4.21       | 2.92                    |
| PDK2   | TF-1_Depletion       | -0.74            | 0.64                         | -1.85       | 1.22                    |
| FBP1   | TF-1_Depletion       | -0.05            | 0.33                         | -1.46       | 0.99                    |
| PDK3   | TF-1_Depletion       | -0.53            | 0.72                         | -1.19       | 1.09                    |
| IDH2   | TF-1_Depletion       | -0.59            | 0.75                         | -1.07       | 1.24                    |
| PGLS   | TF-1_Depletion       | -0.44            | 0.68                         | -1.05       | 1.01                    |
| PRPS1  | TF-1_Depletion       | -0.47            | 0.69                         | -0.82       | 1.11                    |
| SLC2A1 | UCSD-AML1_Depletion  | -1.59            | 1.07                         | 0.17        | 1.37                    |
| MDH1B  | 0                    | -1.00            | 0.87                         | -1.20       | 0.98                    |
| PCK1   | 0                    | -0.49            | 0.70                         | -0.89       | 0.92                    |
| PKM2   | 0                    | -1.35            | 0.96                         | -0.82       | 0.71                    |
| TKT    | 0                    | -0.90            | 0.68                         | -0.70       | 0.61                    |
| PGM2   | 0                    | -0.57            | 0.58                         | -0.49       | 0.60                    |
| SUCLG2 | 0                    | 0.84             | 0.27                         | -0.39       | 0.55                    |
| PGAM1  | 0                    | -0.02            | 0.38                         | -0.36       | 0.54                    |
| PDP2   | 0                    | 0.80             | 0.17                         | -0.18       | 0.45                    |
| PDPR   | 0                    | 0.46             | 0.23                         | -0.14       | 0.37                    |
| PDK1   | 0                    | 0.82             | 0.70                         | -0.12       | 0.51                    |
| PDK4   | 0                    | 0.80             | 0.18                         | -0.07       | 0.34                    |
| PKLR   | 0                    | 1.24             | 0.24                         | 0.15        | 1.25                    |
| TALDO1 | 0                    | 0.61             | 0.50                         | 0.24        | 0.28                    |
| ACLY   | 0                    | 0.42             | 0.31                         | 0.30        | 0.42                    |
| BPGM   | 0                    | -0.20            | 0.45                         | 0.30        | 0.49                    |
| PGK2   | 0                    | 0.06             | 0.66                         | 0.35        | 0.45                    |
| IDH3A  | 0                    | 0.77             | 0.36                         | 0.39        | 0.77                    |
| PFKL   | 0                    | 0.92             | 0.38                         | 0.41        | 0.27                    |
| SLC2A3 | 0                    | 0.41             | 0.51                         | 0.44        | 0.29                    |
| PDHB   | 0                    | 0.70             | 0.17                         | 0.46        | 0.37                    |
| PDHA1  | 0                    | 0.75             | 0.72                         | 0.50        | 0.44                    |
| TPI1   | 0                    | 0.59             | 0.42                         | 0.52        | 0.49                    |
| IDH1   | 0                    | 0.59             | 0.39                         | 0.52        | 0.38                    |
| G6PD   | 0                    | 0.95             | 0.66                         | 0.53        | 0.40                    |
| LDHC   | 0                    | 0.93             | 0.35                         | 0.55        | 0.21                    |
| PC     | 0                    | 0.57             | 0.23                         | 0.56        | 0.24                    |
| PGM1   | 0                    | 0.98             | 0.70                         | 0.58        | 0.37                    |
| PGK1   | 0                    | -0.72            | 0.60                         | 0.61        | 0.47                    |
| DLAT   | 0                    | 0.40             | 0.28                         | 0.61        | 0.37                    |
| PRPS2  | 0                    | 0.67             | 0.23                         | 0.62        | 0.14                    |
| H6PD   | 0                    | 0.69             | 0.64                         | 0.65        | 0.46                    |
| SUCLA2 | 0                    | 0.97             | 0.61                         | 0.65        | 0.34                    |
| HK2    | 0                    | -0.72            | 0.64                         | 0.85        | 0.73                    |
| SLC2A2 | 0                    | 0.99             | 0.49                         | 0.89        | 0.15                    |
| GCK    | 0                    | 0.71             | 0.13                         | 0.91        | 0.07                    |
| HK3    | 0                    | 0.37             | 0.40                         | 1.02        | 0.64                    |
| SUCLG1 | 0                    | 0.55             | 0.26                         | 1.02        | 0.96                    |
| ENO1   | 0                    | -0.81            | 0.62                         | 1.15        | 0.28                    |
| LDHB   | 0                    | 0.20             | 0.30                         | 1.39        | 0.20                    |
| MDH1   | 0                    | 0.70             | 0.59                         | 1.33        | 0.75                    |
| ALDOB  | UCSD-AML1_Enrichment | 1.03             | 1.29                         | 0.69        | 0.67                    |
| MDH2   | UCSD-AML1_Enrichment | 0.45             | 1.05                         | 1.00        | 0.78                    |
| GPI    | TF-1_Enrichment      | 0.98             | 0.13                         | 0.97        | 1.13                    |
| GALM   | TF-1_Enrichment      | 0.87             | 0.57                         | 0.97        | 1.01                    |
| PTEN   | Core_Enrichment      | 1.56             | 2.17                         | 1.33        | 1.52                    |
| PCK2   | Core_Enrichment      | 1.15             | 1.26                         | 0.92        | 0.85                    |
| RPE    | Core_Enrichment      | 1.28             | 2.40                         | 1.02        | 0.90                    |
| GPD2   | Core_Enrichment      | 1.07             | 1.18                         | 1.34        | 1.58                    |
| TP53   | Core_Enrichment      | 1.06             | 1.60                         | 1.44        | 2.06                    |
| RB1    | Core_Enrichment      | 1.79             | 2.24                         | 1.73        | 1.32                    |



Supplementary Table S2

| # ID | Age  | Sex | Diagnosis                       | WHO subtype                    | Disease Status      | FLT3                 | NPM1    | Cytogenetics                                            | Molecular Characteristics           |
|------|------|-----|---------------------------------|--------------------------------|---------------------|----------------------|---------|---------------------------------------------------------|-------------------------------------|
| 1    | 62   | F   | AML                             | Without Maturation             | relapsed/refractory | WT                   | unknown | 46XY, t(3;3)                                            | CEBPa negative                      |
| 2    | 73   | F   | AML                             |                                | relapsed            | mutant               | WT      | karyotype failed                                        | IDH1 mutation                       |
| 3    | 82   | M   | AML                             |                                | relapsed/refractory | FLT3-ITD             | unknown | 46XY                                                    |                                     |
| 4    | 77   | M   | AML                             |                                | refractory          | FLT3 D835            | WT      | 46XY                                                    |                                     |
| 5    | 42   | F   | AML                             | Monoblastic Differentiation    | relapsed            | WT                   | WT      | Complex Karyotype                                       | TP53 mutation                       |
| 6    | 67   | M   | AML                             | Monocytic Differentiation      | relapsed            | WT                   | mutant  | 48XY, +1; +8                                            |                                     |
| 7    | 58   | F   | AML                             |                                | new                 | WT                   | WT      | 47XX, +8                                                |                                     |
| 8    | n/a  | M   | AML                             |                                | n/a                 | n/a                  | n/a     | n/a                                                     |                                     |
| 9    | 72   | M   | AML                             | With MDS Related Changes       | relapsed            | WT                   | WT      | 45Y, t(Y;13), -20, add(3)(q11.2), del5q, add(17)(p11.2) |                                     |
| 10   | 11   | M   | AML                             |                                | new                 | FLT3-ITD             | unknown | 46XY, add(6)(q21), add(9)(p24)                          |                                     |
| 11   | 59   | F   | AML                             |                                | relapsed/refractory | FLT3-ITD             | mutant  | 46XX, t(4;11)                                           |                                     |
| 12   | 73   | F   | AML                             | Myelomonocytic Features        | refractory          | WT                   | WT      | 46XX                                                    |                                     |
| 13   | 70   | M   | AML                             | Monocytic Differentiation      | new                 | WT                   | WT      | 47XY, +11                                               |                                     |
| 14   | 60   | F   | AML                             |                                | new                 | WT                   | WT      | 46 XX, inv16                                            |                                     |
| 15   | 67   | F   | AML                             | Monocytic Differentiation      | new                 | WT                   | mutant  | 46XX                                                    |                                     |
| 16   | 58   | M   | AML                             | Monocytic Differentiation      | new                 | WT                   | WT      | 46XY, del9q                                             |                                     |
| 17   | 38   | M   | AML                             |                                | relapsed            | WT                   | unknown | Complex Karyotype                                       |                                     |
| 18   | 71   | F   | AML                             | Without Maturation             | new                 | WT                   | WT      | complex karyotype, del 5q, del7q                        |                                     |
| 19   | 60   | F   | AML                             |                                | relapsed            | WT                   | unknown | 47XX, +13                                               |                                     |
| 20   | 30   | M   | AML                             | Monocytic Features             | new                 | WT                   | WT      | n/a                                                     | MLL-AF9                             |
| 21   | 48   | F   | AML                             |                                | new                 | WT                   | WT      | 46X, idic(X)(q13)                                       | CEBPa single mutation               |
| 22   | 66,0 | F   | AML                             |                                | new                 | WT                   | WT      | Complex Karyotype                                       |                                     |
| 23   | 71   | F   | AML                             |                                | new                 | FLT3-ITD             | WT      | 46XX, del7q                                             | DNMT3A and IDH1 mutation            |
| 24   | 89   | M   | AML                             |                                | relapsed/refractory | WT                   | WT      | 46XY, del5q                                             |                                     |
| 25   | 58   | F   | AML                             |                                | relapsed            | FLT3-ITD             | WT      | 46XX                                                    |                                     |
| 26   | 69   | F   | AML                             | Myelofibrosis Background       | relapsed            | WT                   | WT      | unknown                                                 | JAK2V617F, IDH1, and TP53 mutations |
| 27   | 25   | M   | AML                             |                                | new                 | WT                   | WT      | 46XY                                                    | WT1 mutation                        |
| 28   | 47   | F   | AML                             |                                | new                 | WT                   | WT      | Complex Karyotype                                       |                                     |
| 29   | n/a  | n/a | AML                             |                                | n/a                 | FLT3-ITD             | n/a     | n/a                                                     |                                     |
| 30   | n/a  | F   | AML                             |                                | refractory          | n/a                  | n/a     | n/a                                                     |                                     |
| 31   | 67   | F   | AML                             |                                | relapsed            | FLT3-ITD             | mutant  | 46XX, t(10;12)                                          |                                     |
| 32   | 63   | M   | AML                             |                                | refractory          | WT                   | WT      | 45XY, -7                                                |                                     |
| 33   | 64   | F   | AML                             | Monocytic Features             | new                 | WT                   | WT      | complex karyotype, -5/del5q                             |                                     |
| 34   | 69   | M   | Acute Undifferentiated Leukemia |                                | new                 | FLT3-ITD             | WT      | 47XY, +13                                               | IDH2 mutation                       |
| 35   | 53   | F   | AML                             |                                | relapsed            | WT                   | WT      | n/a                                                     |                                     |
| 36   | 72   | M   | MDS                             | RAEB-2                         | new                 | WT                   | WT      | 46XY                                                    |                                     |
| 37   | 52   | M   | AML                             |                                | new                 | WT                   | WT      | Complex Karyotype                                       | TET2 and BCORL1 mutations           |
| 38   | 54   | M   | B-ALL                           |                                | new                 | WT                   | WT      | 46XY, t3;11, 19;22                                      |                                     |
| 39   | 44   | F   | AML                             |                                | relapsed            | WT                   | WT      | normal karyotype at initial diagnosis                   |                                     |
| 40   | 60   | M   | AML                             |                                | new                 | WT                   | WT      | Complex Karyotype                                       |                                     |
| 41   | 75   | M   | AML                             |                                | new                 | WT                   | WT      | 46XY, t(8;21)                                           |                                     |
| 42   | 44   | F   | AML                             |                                | relapsed            | FLT3-ITD, FLT3 D835  | mutant  | n/a                                                     |                                     |
| 43   | 49   | M   | AML                             | Monocytic                      | new                 | FLT3-ITD             | mutant  | 46XY                                                    |                                     |
| 44   | 64   | F   | AML                             |                                | new                 | WT                   | WT      | 46XX                                                    |                                     |
| 45   | 63   | F   | MDS                             | RAEB                           | new                 | WT                   | WT      | Complex Karyotype                                       |                                     |
| 46   | 37   | M   | AML                             |                                | new                 | n/a                  | n/a     | n/a                                                     |                                     |
| 47   | 65   | F   | AML                             | Therapy Related                | relapsed            | FLT3-ITD             | unknown | 46XX                                                    |                                     |
| 48   | 66   | M   | AML                             | Myelomonocytic Differentiation | new                 | FLT3 D835            | mutant  | 46XY                                                    |                                     |
| 49   | 60   | M   | AML                             |                                | new                 | WT                   | WT      | 46XY, t(15;17)                                          |                                     |
| 50   | 63   | F   | AML                             |                                | relapsed            | FLT3 D835            | mutant  | 46XX, del7q                                             |                                     |
| 51   | 61   | M   | AML                             |                                | relapsed            | FLT3-ITD, FLT3 D835Y | mutant  | 47X, -Y, del6q, +8, +14, del15q                         |                                     |
| 52   | 58   | M   | AML                             |                                | new                 | WT                   | WT      | 48XY, +11, +22                                          |                                     |
| 53   | 67   | M   | AML                             |                                | refractory          | WT                   | unknown | Complex Karyotype                                       |                                     |
| 54   | 66   | F   | AML                             |                                | new                 | FLT3-ITD             | unknown | 46XX                                                    |                                     |
| 55   | 63   | M   | AML                             |                                | new                 | WT                   | WT      | 46XY, del20q                                            |                                     |
| 56   | 41   | M   | AML                             |                                | relapsed            | WT                   | WT      | 45XY, -7                                                |                                     |
| 57   | 74   | M   | AML                             | MDS Changes                    | new AML             | WT                   | WT      | 46XY                                                    |                                     |
| 58   | 83   | M   | AML                             |                                | refractory          | FLT3-ITD             | unknown | 46XY                                                    |                                     |
| 59   | 75   | M   | AML                             |                                | relapsed            | unknown              | WT      | 46X, -Y, +11, t1;22                                     |                                     |
| 60   | 80   | M   | MDS                             |                                | new                 | WT                   | WT      | 46XY, del 20q                                           | CEBPA negative                      |
| 61   | 75   | M   | AML                             | MDS Related Changes            | new                 | WT                   | WT      | n/a                                                     |                                     |
| 62   | 48   | M   | AML                             |                                | refractory          | WT                   | WT      | Complex Karyotype                                       | TP53 mutations                      |
| 63   | 58   | M   | AML                             |                                | new                 | FLT3-ITD             | mutant  | n/a                                                     |                                     |
| 64   | 65   | F   | AML                             |                                | relapsed            | WT                   | WT      | 46XX, del7q                                             | DNMT3A and IDH2 mutations           |
| 65   | 57   | F   | AML                             |                                | new                 | WT                   | WT      | Complex Karyotype                                       | TP53 mutant                         |
| 66   | 55   | M   | AML                             | Monocytic Differentiation      | new                 | WT                   | mutant  | 47XY, +8                                                |                                     |
| 67   | 74   | M   | AML                             |                                | relapsed            | WT                   | mutant  | 46XY, del15q                                            | IDH1 mutation                       |
| 68   | 52   | M   | AML                             |                                | new                 | FLT3-ITD             | WT      | 46XY, t(15;17)                                          |                                     |





















**Supplementary Table S5**

| #  | Functional Group      | Geneset ID                                                         | NES    | Adjusted P value | Ccr vs ctl |
|----|-----------------------|--------------------------------------------------------------------|--------|------------------|------------|
| 1  |                       | BIOCARTA_CELLCYCLE_PATHWAY                                         | -1,530 | 0,012            | DOWN       |
| 2  |                       | REGULATION_OF_MITOSIS                                              | -1,696 | 0,014            | DOWN       |
| 3  |                       | WHITFIELD_CELL_CYCLE_G2_M                                          | -1,716 | 0,014            | DOWN       |
| 4  |                       | CELL_CYCLE_CHECKPOINT_GO_0000075                                   | -1,490 | 0,021            | DOWN       |
| 5  |                       | CHANG_CYCLING_GENES                                                | -1,756 | 0,022            | DOWN       |
| 6  |                       | PUJANA_CHEK2_PCC_NETWORK                                           | -1,747 | 0,033            | DOWN       |
| 7  |                       | REGULATION_OF_CELL_CYCLE                                           | -1,305 | 0,036            | DOWN       |
| 8  | Cell Cycle            | CELL_CYCLE_GO_0007049                                              | -1,312 | 0,038            | DOWN       |
| 9  |                       | MITOTIC_CELL_CYCLE_CHECKPOINT                                      | -1,609 | 0,045            | DOWN       |
| 10 |                       | MITOTIC_CELL_CYCLE                                                 | -1,422 | 0,046            | DOWN       |
| 11 |                       | MITOSIS                                                            | -1,506 | 0,048            | DOWN       |
| 12 |                       | KEGG_CELL_CYCLE                                                    | -1,458 | 0,053            | DOWN       |
| 13 |                       | REACTOME_MITOTIC_G1_G1_S_PHASES                                    | -1,638 | 0,055            | DOWN       |
| 14 |                       | REACTOME_RNA_POL_III_TRANSCRIPTION_INITIATION_FROM_TYPE_2_PROMOTER | -1,633 | 0,062            | DOWN       |
| 15 |                       | LAMB_CCND1_TARGETS                                                 | -1,432 | 0,062            | DOWN       |
| 16 |                       | MOLENAAR_TARGETS_OF_CCND1_AND_CDK4_UP                              | -1,634 | 0,020            | DOWN       |
| 17 |                       | KEGG_FRUCTOSE_AND_MANNOSE_METABOLISM                               | -1,848 | 0,010            | DOWN       |
| 18 |                       | REACTOME_GLUCOSE_METABOLISM                                        | -1,662 | 0,024            | DOWN       |
| 19 |                       | REACTOME_GLUCOSE_TRANSPORT                                         | -1,615 | 0,039            | DOWN       |
| 20 | Energy Metabolism     | MOOTHA_GLYCOLYSIS                                                  | -1,559 | 0,026            | DOWN       |
| 21 |                       | GLUCOSE_METABOLIC_PROCESS                                          | -1,554 | 0,021            | DOWN       |
| 22 |                       | BIOCARTA_MITOCHONDRIA_PATHWAY                                      | -1,536 | 0,028            | DOWN       |
| 23 |                       | REACTOME_GLYCOLYSIS                                                | -1,521 | 0,048            | DOWN       |
| 24 |                       | PID_MYC_ACTIV_PATHWAY                                              | -1,856 | 0,001            | DOWN       |
| 25 |                       | IVANOVA_HEMATOPOIESIS_LATE_PROGENITOR                              | -1,533 | 0,001            | DOWN       |
| 26 |                       | WEI_MYCN_TARGETS_WITH_E_BOX                                        | -1,979 | 0,004            | DOWN       |
| 27 |                       | BENPORATH_ES_1                                                     | -1,610 | 0,010            | DOWN       |
| 28 |                       | KIM_MYCN_AMPLIFICATION_TARGETS_UP                                  | -1,415 | 0,015            | DOWN       |
| 29 |                       | IVANOVA_HEMATOPOIESIS_EARLY_PROGENITOR                             | -1,507 | 0,017            | DOWN       |
| 30 | Cell Stemness         | BENPORATH_NANOG_TARGETS                                            | -1,445 | 0,018            | DOWN       |
| 31 |                       | KEGG_ACUTE_MYELOID_LEUKEMIA                                        | -1,747 | 0,018            | DOWN       |
| 32 |                       | GAZDA_DIAMOND_BLACKFAN_ANEMIA_PROGENITOR_UP                        | -1,675 | 0,023            | DOWN       |
| 33 |                       | BENPORATH_ES_2                                                     | -1,494 | 0,049            | DOWN       |
| 34 |                       | RAMALHO_STEMNESS_UP                                                | -1,638 | 0,034            | DOWN       |
| 35 |                       | BILD_MYC_ONCOGENIC_SIGNATURE                                       | -1,362 | 0,032            | DOWN       |
| 36 |                       | DMAP_MONO.VS.HSC                                                   | 1,623  | 0,001            | UP         |
| 37 |                       | KRIGE_RESPONSE_TO_TOSEDOSTAT_6HR                                   | 1,705  | 0,012            | UP         |
| 38 |                       | ZUBER_JQ1_DIFFERENTIATION                                          | 1,950  | 0,012            | UP         |
| 39 | Cell Differentiation  | DIFFERENTIATION_DOT1L                                              | 1,387  | 0,038            | UP         |
| 40 |                       | STEGMAIER_DIFFERENTIATION_PMA                                      | 1,459  | 0,042            | UP         |
| 41 |                       | STEGMAIER_DIFFERENTIATION_VITD                                     | 1,442  | 0,061            | UP         |
| 42 |                       | DIFFERENTIATION_ZUBER                                              | 1,499  | 0,013            | UP         |
| 43 |                       | KEGG_TYROSINE_METABOLISM                                           | 1,459  | 0,018            | UP         |
| 44 | Amino Acid Metabolism | KEGG_BETA_ALANINE_METABOLISM                                       | 1,548  | 0,022            | UP         |
| 45 |                       | KEGG_GLYCINE_SERINE_AND_THREONINE_METABOLISM                       | 1,746  | 0,001            | UP         |

**Extended Data. Uncropped images from immunoblot experiments presented in main and supplementary figures.**

**Figure 1F**

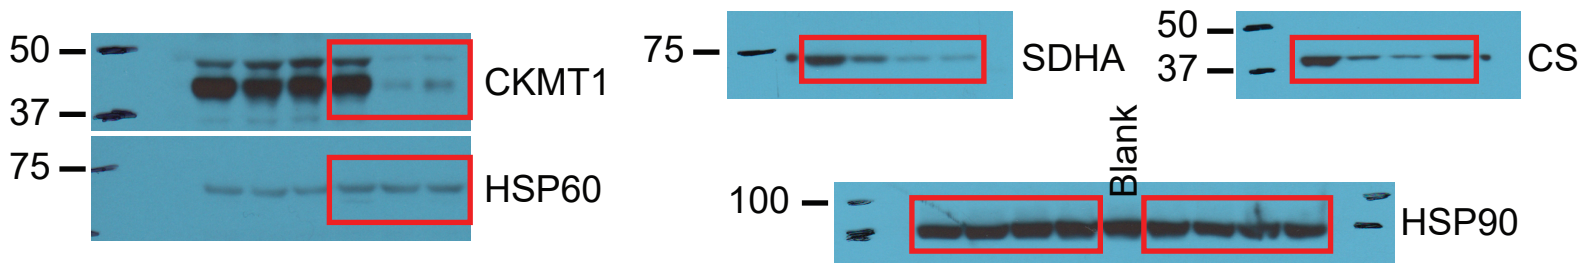

**Figure 2A**

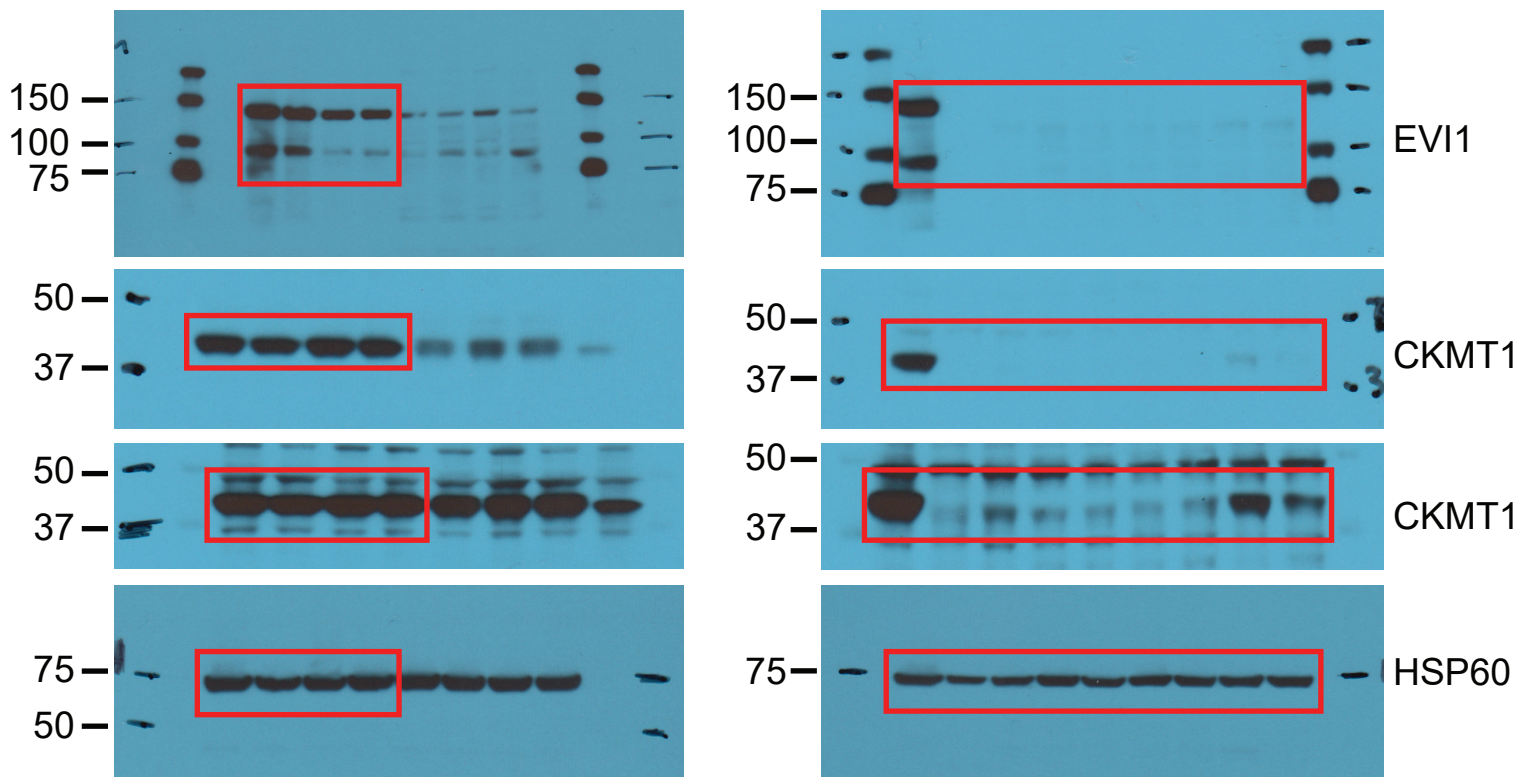

**Figure 2F**

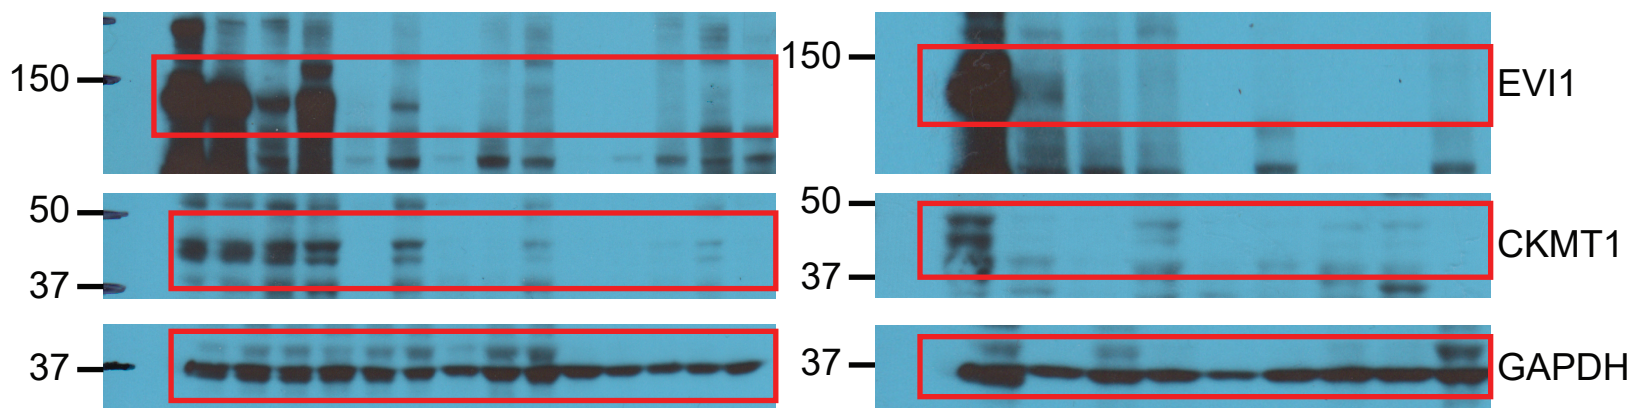

# Extended Data (cont'd)

## Figure 3A

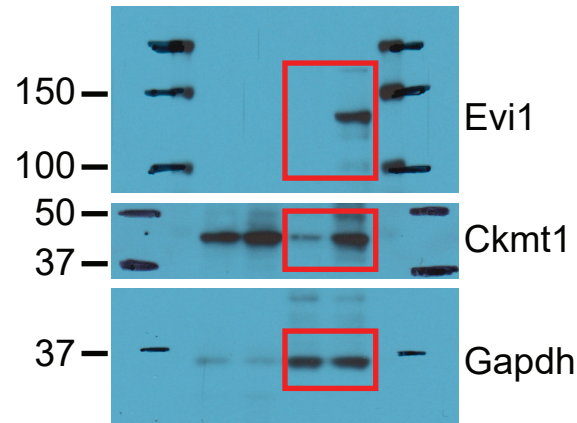

## Figure 3G

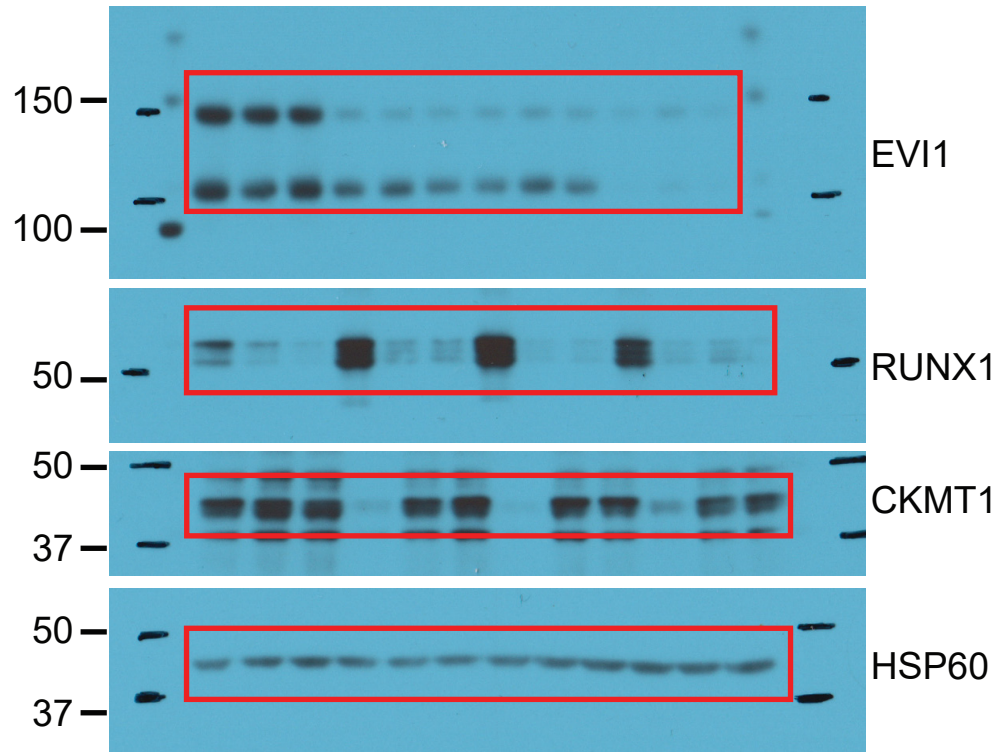

## Figure 6A

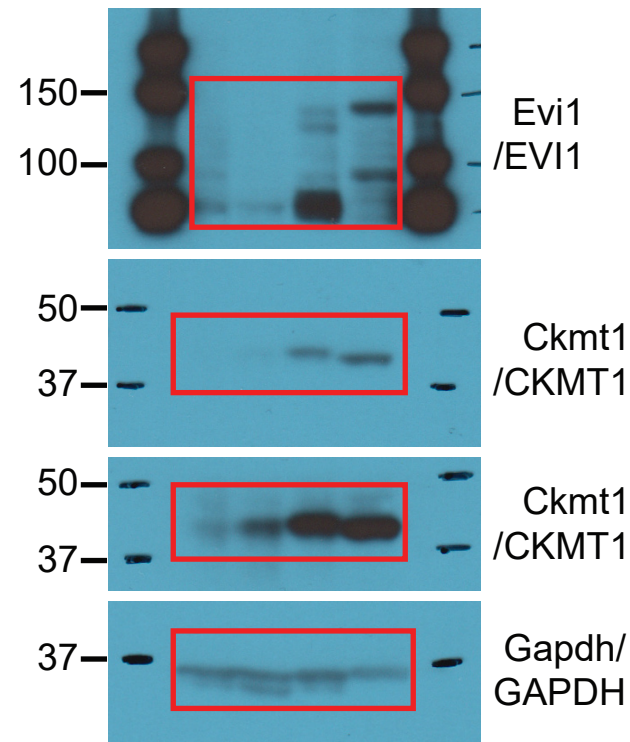

## Figure 6C

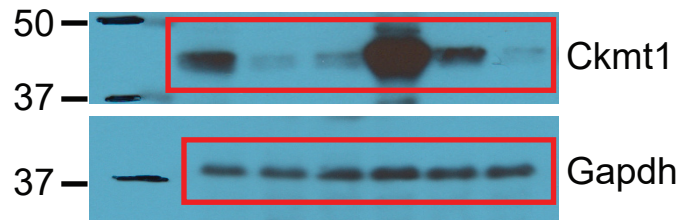

## Supplementary Figure S2A

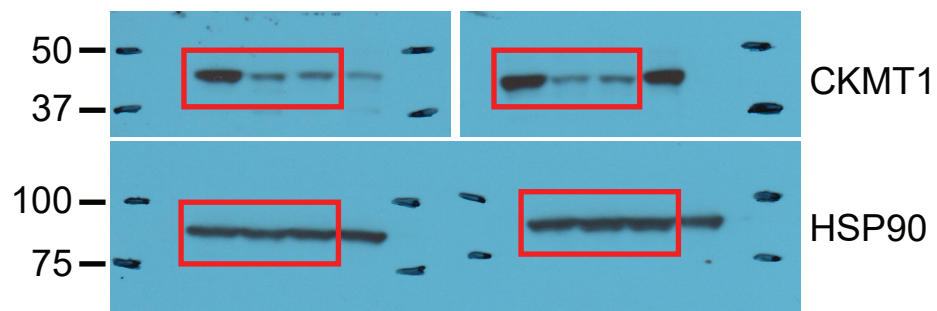

# Extended Data (cont'd)

## Supplementary Figure S2C

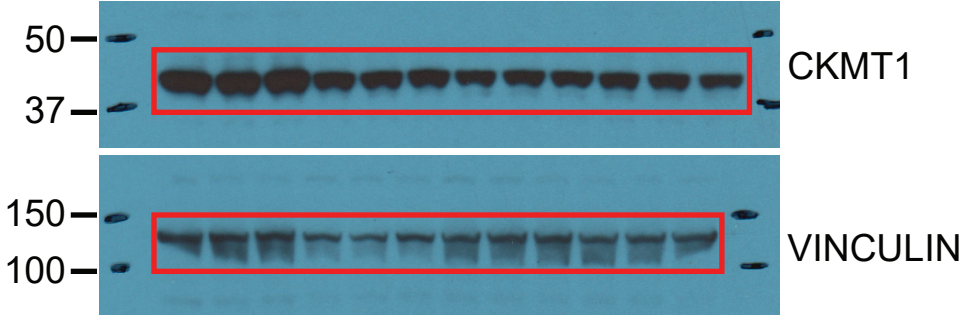

## Supplementary Figure S2E

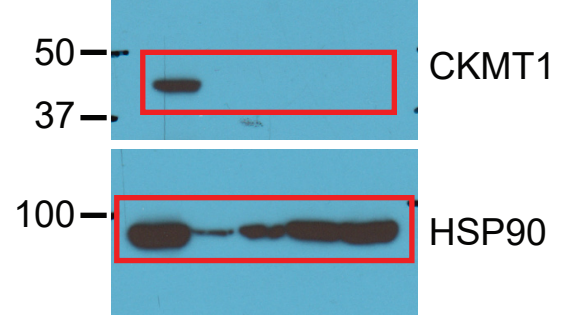

## Supplementary Figure S3B

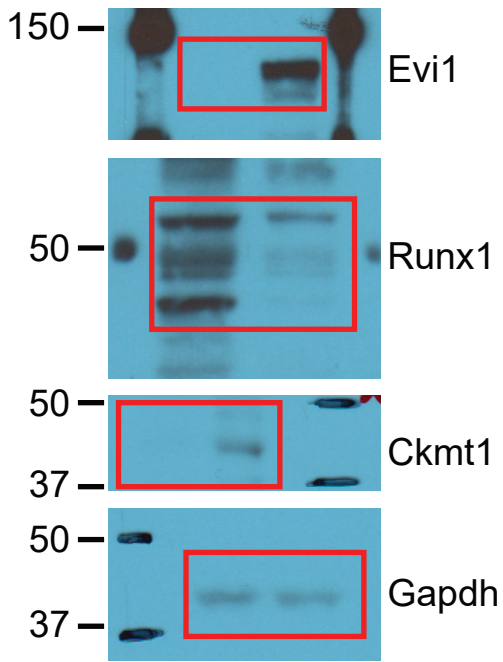

## Supplementary Figure S3D

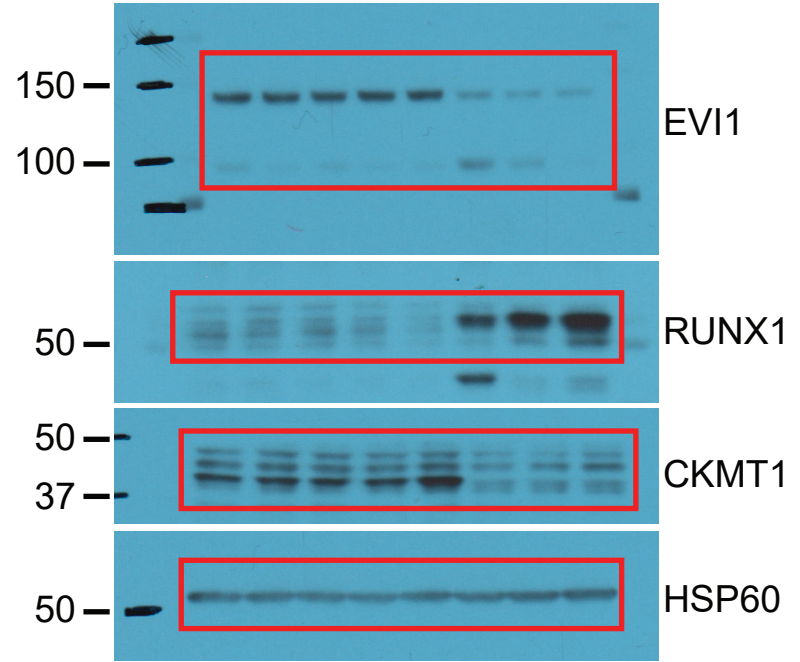

## Supplementary S5A

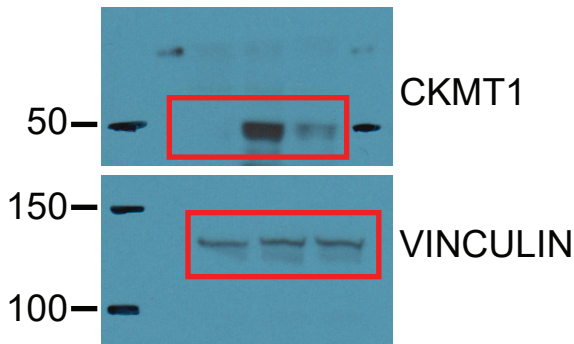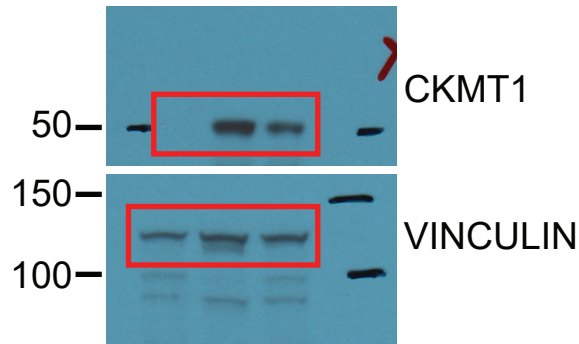

Supplement: NIHMS876844-supplement-Supplemental_Figures_and_Tables.pdf [file NIHMS876844-supplement-Supplemental_Figures_and_Tables.pdf]
